# Supplementary figures and images for: Functional and structural characterization of the integrase from the prototype foamy virus
Source: PubMed Central journal article supplement — Nucleic Acids Res. 2008 Nov 26;37(1):243–55. doi: 10.1093/nar/gkn938 (PMC2615609; doi:10.1093/nar/gkn938), 2008-11-26

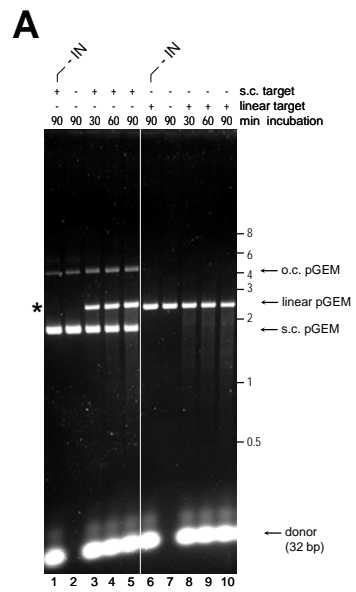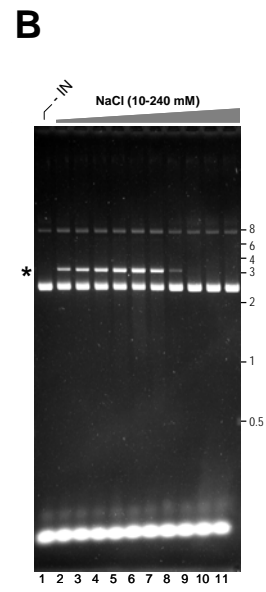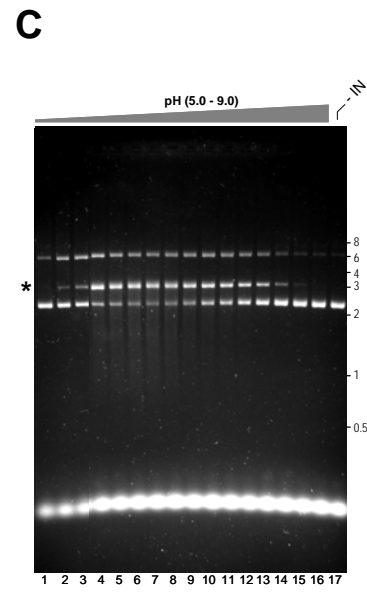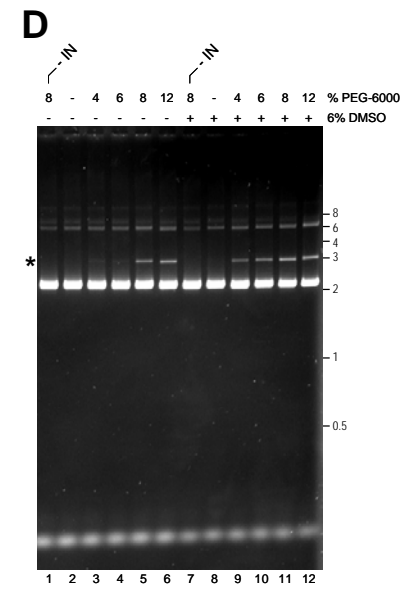

0.32  $\mu$ M IN, 80 nM donor

Supplement: gkn938_1.pdf [file gkn938_1.pdf]

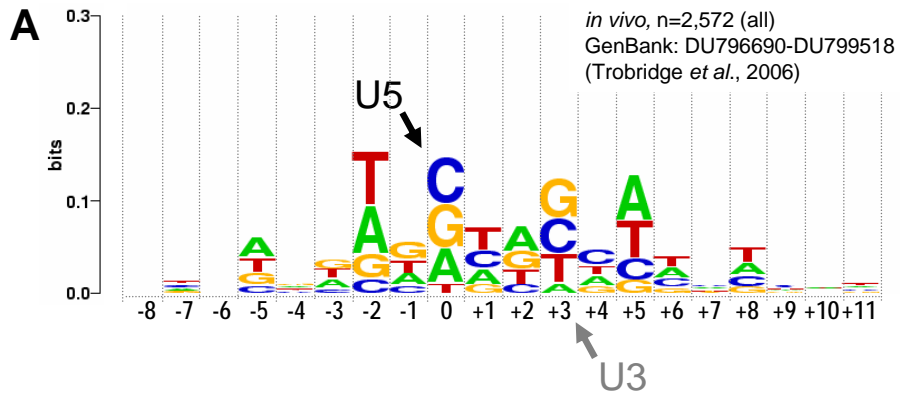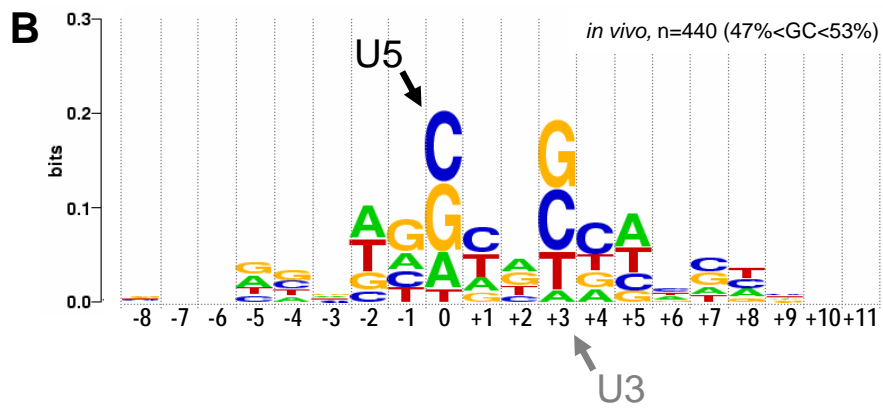

Supplement: gkn938_2.pdf [file gkn938_2.pdf]
